# Supplementary material for: Retinal proteome alterations in a mouse model of type 2 diabetes
Source: Springer Nature journal article supplement (doi:10.1007/s00125-013-3070-2), 2013-09-28
Supplement: MOESM1 [file 8091908]

**Electronic Supplementary Table 1.** Primer sequences for gene expression studies.

| Gene           | Forward Primer         | Reverse Primer        | Size (bp) |
|----------------|------------------------|-----------------------|-----------|
| <i>Hprt1</i>   | TCCTCCTCAGACCGCTTTT    | CCTGGTTCATCATCGCTAATC | 90        |
| <i>Slc17a7</i> | CTTTTGCGGTTCCCTATGCTGG | AAAGTCAGCGATCTGGCCTC  | 463       |
