# Supplementary material for: Retinal proteome alterations in a mouse model of type 2 diabetes
Source: Springer Nature journal article supplement (doi:10.1007/s00125-013-3070-2), 2013-09-28
Supplement: MOESM4 [file 8091908]

**Electronic Supplementary Table 4.** List of differentially abundant proteins in diabetic retina.

| <b>Accession</b>   | <b>Gene Symbol</b> | <b>Name</b>                                                                     | <b>db vs. wt<br/><i>p</i>-value</b> | <b>fold<br/>change<br/>db/wt</b> |
|--------------------|--------------------|---------------------------------------------------------------------------------|-------------------------------------|----------------------------------|
| ENSMUSP00000069692 | 4930572J05Rik      | RIKEN cDNA 4930572J05 gene                                                      | 0.002                               | 0.2                              |
| ENSMUSP00000022317 | 5730469M10Rik      | RIKEN cDNA 5730469M10 gene                                                      | 0.048                               | 0.3                              |
| ENSMUSP00000013995 | Abca4              | ATP-binding cassette, sub-family A (ABC1), member 4                             | 0.046                               | 1.7                              |
| ENSMUSP00000007251 | Abhd16a            | abhydrolase domain containing 16A                                               | 0.005                               | 0.2                              |
| ENSMUSP00000027684 | Arl8a              | ADP-ribosylation factor-like 8A                                                 | 0.018                               | 0.4                              |
| ENSMUSP00000069962 | Atad1              | ATPase family, AAA domain containing 1                                          | 0.023                               | 0.6                              |
| ENSMUSP00000039657 | Atp1a1             | ATPase, Na <sup>+</sup> /K <sup>+</sup> transporting, alpha 1 polypeptide       | 0.041                               | 0.8                              |
| ENSMUSP00000027863 | Atp1b1             | ATPase, Na <sup>+</sup> /K <sup>+</sup> transporting, beta 1 polypeptide        | 0.006                               | 0.8                              |
| ENSMUSP00000020107 | Atp2b1             | ATPase, Ca <sup>++</sup> transporting, plasma membrane 1                        | 0.035                               | 0.8                              |
| ENSMUSP00000033744 | Atp2b3             | ATPase, Ca <sup>++</sup> transporting, plasma membrane 3                        | 0.022                               | 0.5                              |
| ENSMUSP00000113022 | Atp5f1             | ATP synthase, H <sup>+</sup> transporting, mitochondrial F0 complex, subunit B1 | 0.038                               | 0.6                              |
| ENSMUSP00000019231 | Atp6ap1            | ATPase, H <sup>+</sup> transporting, lysosomal accessory protein 1              | 0.016                               | 0.02                             |
| ENSMUSP00000027853 | Brp44              | brain protein 44                                                                | 0.003                               | 0.2                              |
| ENSMUSP00000045654 | Brp44l             | brain protein 44-like                                                           | 0.017                               | 0.7                              |
| ENSMUSP00000049457 | Cacna2d1           | calcium channel, voltage-dependent, alpha2/delta subunit 1                      | 0.002                               | 0.4                              |
| ENSMUSP00000063359 | Camk2d             | calcium/calmodulin-dependent protein kinase II, delta                           | 0.020                               | 0.3                              |
| ENSMUSP00000071720 | Camk2g             | calcium/calmodulin-dependent protein kinase II gamma                            | 0.002                               | 0.3                              |
| ENSMUSP00000025166 | Cdh2               | cadherin 2                                                                      | 0.012                               | 2.0                              |
| ENSMUSP00000050336 | Ckap4              | cytoskeleton-associated protein 4                                               | 0.045                               | 0.6                              |
| ENSMUSP00000034881 | Cox7a2             | cytochrome c oxidase, subunit VIIa 2                                            | 0.003                               | 0.2                              |
| ENSMUSP00000033582 | Cox7b              | cytochrome c oxidase subunit VIIb                                               | 0.043                               | 0.5                              |
| ENSMUSP00000025835 | Cpt1a              | carnitine palmitoyltransferase 1a, liver                                        | 0.044                               | 0.3                              |
| ENSMUSP00000130294 | Ctbp2              | C-terminal binding protein 2                                                    | 0.022                               | 0.5                              |
| ENSMUSP00000030538 | Ddost              | dolichyl-di-phosphooligosaccharide-protein glycotransferase                     | 0.004                               | 0.3                              |

|                    |          |                                                             |       |      |
|--------------------|----------|-------------------------------------------------------------|-------|------|
| ENSMUSP00000055535 | Ddx17    | DEAD (Asp-Glu-Ala-Asp) box polypeptide 17                   | 0.042 | 0.4  |
| ENSMUSP00000099012 | Dpp6     | dipeptidylpeptidase 6                                       | 0.004 | 0.3  |
| ENSMUSP00000052287 | Elmod2   | ELMO domain containing 2                                    | 0.028 | 1.6  |
| ENSMUSP00000133820 | Fus      | fusion, derived from t(12;16) malignant liposarcoma (human) | 0.022 | 0.1  |
| ENSMUSP00000029654 | Glrb     | glycine receptor, beta subunit                              | 0.012 | 0.3  |
| ENSMUSP00000104690 | Gm14399  | predicted gene 14399                                        | 0.048 | 0.3  |
| ENSMUSP00000100802 | Gm4294   | predicted gene 4294                                         | 0.039 | 3.0  |
| ENSMUSP00000085850 | Gm6543   | predicted gene 6543                                         | 0.025 | 0.1  |
| ENSMUSP00000128163 | Gm6793   | predicted gene 6793                                         | 0.007 | 0.01 |
| ENSMUSP00000076607 | Gm7536   | predicted gene 7536                                         | 0.020 | 0.3  |
| ENSMUSP00000046557 | Gng12    | guanine nucleotide binding protein (G protein), gamma 12    | 0.028 | 0.1  |
| ENSMUSP00000110760 | Gng13    | guanine nucleotide binding protein (G protein), gamma 13    | 0.005 | 0.2  |
| ENSMUSP00000055256 | Gng2     | guanine nucleotide binding protein (G protein), gamma 2     | 0.008 | 0.5  |
| ENSMUSP00000093978 | Gng3     | guanine nucleotide binding protein (G protein), gamma 3     | 0.027 | 0.4  |
| ENSMUSP00000016081 | H2afy    | H2A histone family, member Y                                | 0.037 | 0.3  |
| ENSMUSP00000016703 | H3f3b    | H3 histone, family 3B                                       | 0.027 | 0.2  |
| ENSMUSP00000085006 | Hist1h4j | histone cluster 1, H4j                                      | 0.038 | 0.3  |
| ENSMUSP00000072195 | Hk1      | hexokinase 1                                                | 0.025 | 0.4  |
| ENSMUSP00000043390 | Icmt     | isoprenylcysteine carboxyl methyltransferase                | 0.001 | 0.6  |
| ENSMUSP00000032399 | Kras     | v-Ki-ras2 Kirsten rat sarcoma viral oncogene homolog        | 0.002 | 0.5  |
| ENSMUSP00000025486 | Lmnb1    | lamin B1                                                    | 0.007 | 2.0  |
| ENSMUSP00000026013 | Maoa     | monoamine oxidase A                                         | 0.012 | 0.5  |
| ENSMUSP00000055776 | Mlec     | malectin                                                    | 0.040 | 0.1  |
| ENSMUSP00000121668 | Mlxipl   | MLX interacting protein-like                                | 0.022 | 0.4  |
| ENSMUSP00000107092 | Mtch2    | mitochondrial carrier homolog 2 (C. elegans)                | 0.048 | 0.6  |
| ENSMUSP00000080991 | mt-Nd1   | mitochondrially encoded NADH dehydrogenase 1                | 0.016 | 0.1  |
| ENSMUSP00000080998 | mt-Nd3   | mitochondrially encoded NADH dehydrogenase 3                | 0.027 | 0.5  |
| ENSMUSP00000081000 | mt-Nd4   | mitochondrially encoded NADH dehydrogenase 4                | 0.007 | 0.4  |
| ENSMUSP00000081001 | mt-Nd5   | mitochondrially encoded NADH dehydrogenase 5                | 0.013 | 0.2  |
| ENSMUSP00000073261 | Mtx1     | metaxin 1                                                   | 0.049 | 0.4  |

|                    |         |                                                                                             |       |     |
|--------------------|---------|---------------------------------------------------------------------------------------------|-------|-----|
| ENSMUSP00000021170 | Mxra7   | matrix-remodelling associated 7                                                             | 0.043 | 1.4 |
| ENSMUSP00000045864 | Nceh1   | arylacetamide deacetylase-like 1                                                            | 0.018 | 0.4 |
| ENSMUSP00000112744 | Ncln    | nicalin homolog (zebrafish)                                                                 | 0.002 | 0.5 |
| ENSMUSP00000002452 | Ndufa11 | NADH dehydrogenase (ubiquinone) 1 alpha subcomplex 11                                       | 0.001 | 0.3 |
| ENSMUSP00000020209 | Ndufa12 | NADH dehydrogenase (ubiquinone) 1 alpha subcomplex, 12                                      | 0.004 | 0.2 |
| ENSMUSP00000105796 | Ndufa13 | NADH dehydrogenase (ubiquinone) 1 alpha subcomplex, 13                                      | 0.013 | 0.6 |
| ENSMUSP00000031637 | Ndufa4  | NADH dehydrogenase (ubiquinone) 1 alpha subcomplex, 4                                       | 0.013 | 0.4 |
| ENSMUSP00000085523 | Ndufa9  | NADH dehydrogenase (ubiquinone) 1 alpha subcomplex, 9                                       | 0.003 | 0.5 |
| ENSMUSP00000043543 | Ndufb10 | NADH dehydrogenase (ubiquinone) 1 beta subcomplex, 10                                       | 0.027 | 1.9 |
| ENSMUSP00000092746 | Ndufb6  | NADH dehydrogenase (ubiquinone) 1 beta subcomplex, 6                                        | 0.011 | 0.5 |
| ENSMUSP00000041132 | Negr1   | neuronal growth regulator 1                                                                 | 0.004 | 1.5 |
| ENSMUSP00000079289 | Opn1sw  | opsin 1 (cone pigments), short-wave-sensitive (color blindness, tritan)                     | 0.041 | 2.3 |
| ENSMUSP00000004375 | Phb2    | prohibitin 2                                                                                | 0.009 | 1.3 |
| ENSMUSP00000065511 | Rgs9bp  | regulator of G-protein signalling 9 binding protein                                         | 0.050 | 1.8 |
| ENSMUSP00000093961 | Rom1    | rod outer segment membrane protein 1                                                        | 0.002 | 2.7 |
| ENSMUSP00000058368 | Rpl18a  | ribosomal protein L18A                                                                      | 0.046 | 0.4 |
| ENSMUSP00000092502 | Rps2    | ribosomal protein S2                                                                        | 0.023 | 0.3 |
| ENSMUSP00000099878 | Rps6    | ribosomal protein S6                                                                        | 0.048 | 0.5 |
| ENSMUSP00000035898 | Scamp5  | secretory carrier membrane protein 5                                                        | 0.038 | 2.1 |
| ENSMUSP00000106968 | Sdhc    | succinate dehydrogenase complex, subunit C, integral membrane protein                       | 0.010 | 0.4 |
| ENSMUSP00000017884 | Slc12a5 | solute carrier family 12, member 5                                                          | 0.017 | 0.6 |
| ENSMUSP00000082489 | Slc17a7 | solute carrier family 17 (sodium-dependent inorganic phosphate cotransporter), member 7     | 0.015 | 0.3 |
| ENSMUSP00000005493 | Slc1a3  | solute carrier family 1 (glial high affinity glutamate transporter), member 3               | 0.004 | 0.5 |
| ENSMUSP00000003622 | Slc25a1 | solute carrier family 25 (mitochondrial carrier, citrate transporter), member 1             | 0.028 | 0.4 |
| ENSMUSP00000034049 | Slc25a4 | solute carrier family 25 (mitochondrial carrier, adenine nucleotide translocator), member 4 | 0.004 | 0.6 |

|                     |          |                                                                                             |       |     |
|---------------------|----------|---------------------------------------------------------------------------------------------|-------|-----|
| ENSMUSP00000016463  | Slc25a5  | solute carrier family 25 (mitochondrial carrier, adenine nucleotide translocator), member 5 | 0.037 | 0.7 |
| ENSMUSP00000010208  | Slc38a3  | solute carrier family 38, member 3                                                          | 0.022 | 1.4 |
| ENSMUSP000000109173 | Slc4a3   | solute carrier family 4 (anion exchanger), member 3                                         | 0.006 | 0.1 |
| ENSMUSP00000037576  | Sv2a     | synaptic vesicle glycoprotein 2 a                                                           | 0.022 | 0.7 |
| ENSMUSP00000082254  | Sv2b     | synaptic vesicle glycoprotein 2 b                                                           | 0.009 | 0.6 |
| ENSMUSP00000009727  | Syngr1   | synaptogyrin 1                                                                              | 0.046 | 0.4 |
| ENSMUSP00000037583  | Tmed10   | transmembrane emp24-like trafficking protein 10 (yeast)                                     | 0.014 | 0.3 |
| ENSMUSP00000023062  | Tom22    | translocase of outer mitochondrial membrane 22 homolog (yeast)                              | 0.037 | 0.4 |
| ENSMUSP00000027738  | Tor1aip1 | torsin A interacting protein 1                                                              | 0.006 | 0.3 |
| ENSMUSP00000060246  | Tubb2a   | tubulin, beta 2A class IIA                                                                  | 0.049 | 0.4 |
| ENSMUSP00000071135  | Tubb4a   | tubulin, beta 4A class IVA                                                                  | 0.001 | 0.1 |
| ENSMUSP00000001566  | Tubb5    | tubulin, beta 5 class I                                                                     | 0.013 | 0.4 |
| ENSMUSP00000019649  | Ubb      | ubiquitin B                                                                                 | 0.000 | 2.7 |
| ENSMUSP00000054856  | Uqcrl1   | ubiquinol-cytochrome c reductase, complex III subunit X                                     | 0.045 | 0.4 |
| ENSMUSP00000021993  | Uqcrl2   | ubiquinol-cytochrome c reductase binding protein                                            | 0.036 | 9.6 |
| ENSMUSP00000026743  | Uqcrl3   | ubiquinol-cytochrome c reductase core protein 1                                             | 0.006 | 2.0 |
| ENSMUSP00000024897  | Vapa     | vesicle-associated membrane protein, associated protein A                                   | 0.048 | 3.1 |
| ENSMUSP00000020673  | Vdac1    | voltage-dependent anion channel 1                                                           | 0.009 | 0.6 |
| ENSMUSP00000022293  | Vdac2    | voltage-dependent anion channel 2                                                           | 0.049 | 0.7 |
