# Supplementary material for: Retinal proteome alterations in a mouse model of type 2 diabetes
Source: Springer Nature journal article supplement (doi:10.1007/s00125-013-3070-2), 2013-09-28
Supplement: MOESM8 [file 8091908]

**Electronic Supplementary Table 8.** List of differentially abundant proteins in metformin-treated diabetic retina.

| <b>Accession</b>   | <b>Gene Symbol</b> | <b>Name</b>                                                              | <b>db vs dbM<br/><i>p</i>-value</b> |
|--------------------|--------------------|--------------------------------------------------------------------------|-------------------------------------|
| ENSMUSP00000069692 | 4930572J05Rik      | RIKEN cDNA 4930572J05 gene                                               | 0.004                               |
| ENSMUSP00000034983 | Atp1b3             | ATPase, Na <sup>+</sup> /K <sup>+</sup> transporting, beta 3 polypeptide | 0.040                               |
| ENSMUSP00000019231 | Atp6ap1            | ATPase, H <sup>+</sup> transporting, lysosomal accessory protein 1       | 0.004                               |
| ENSMUSP00000027853 | Brp44              | brain protein 44                                                         | 0.005                               |
| ENSMUSP00000049457 | Cacna2d1           | calcium channel, voltage-dependent, alpha2/delta subunit 1               | 0.035                               |
| ENSMUSP00000010210 | Cacna2d2           | calcium channel, voltage-dependent, alpha 2/delta subunit 2              | 0.045                               |
| ENSMUSP00000025166 | Cdh2               | cadherin 2                                                               | 0.010                               |
| ENSMUSP00000084464 | Cnga1              | cyclic nucleotide gated channel alpha 1                                  | 0.041                               |
| ENSMUSP00000034881 | Cox7a2             | cytochrome c oxidase, subunit VIIa 2                                     | 0.007                               |
| ENSMUSP00000044924 | Dhrs7b             | dehydrogenase/reductase (SDR family) member 7B                           | 0.034                               |
| ENSMUSP00000099012 | Dpp6               | dipeptidylpeptidase 6                                                    | 0.043                               |
| ENSMUSP00000018851 | Dync1h1            | dynein cytoplasmic 1 heavy chain 1                                       | 0.008                               |
| ENSMUSP00000052287 | Elmod2             | ELMO domain containing 2                                                 | 0.036                               |
| ENSMUSP00000029654 | Glrb               | glycine receptor, beta subunit                                           | 0.029                               |
| ENSMUSP00000100802 | Gm4294             | predicted gene 4294                                                      | 0.035                               |
| ENSMUSP00000085850 | Gm6543             | predicted gene 6543                                                      | 0.017                               |
| ENSMUSP00000046557 | Gng12              | guanine nucleotide binding protein (G protein), gamma 12                 | 0.022                               |
| ENSMUSP00000072195 | Hk1                | hexokinase 1                                                             | 0.027                               |
| ENSMUSP00000025486 | Lmnb1              | lamin B1                                                                 | 0.003                               |
| ENSMUSP00000022099 | Lpcat1             | lysophosphatidylcholine acyltransferase 1                                | 0.001                               |
| ENSMUSP00000026013 | Maoa               | monoamine oxidase A                                                      | 0.017                               |
| ENSMUSP00000055776 | Mlec               | malectin                                                                 | 0.002                               |

|                    |         |                                                                                             |       |
|--------------------|---------|---------------------------------------------------------------------------------------------|-------|
| ENSMUSP00000080991 | mt-Nd1  | mitochondrially encoded NADH dehydrogenase 1                                                | 0.001 |
| ENSMUSP00000081000 | mt-Nd4  | mitochondrially encoded NADH dehydrogenase 4                                                | 0.009 |
| ENSMUSP00000081001 | mt-Nd5  | mitochondrially encoded NADH dehydrogenase 5                                                | 0.030 |
| ENSMUSP00000021170 | Mxra7   | matrix-remodelling associated 7                                                             | 0.014 |
| ENSMUSP00000045864 | Nceh1   | arylacetamide deacetylase-like 1                                                            | 0.020 |
| ENSMUSP00000020209 | Ndufa12 | NADH dehydrogenase (ubiquinone) 1 alpha subcomplex, 12                                      | 0.005 |
| ENSMUSP00000105796 | Ndufa13 | NADH dehydrogenase (ubiquinone) 1 alpha subcomplex, 13                                      | 0.037 |
| ENSMUSP00000031637 | Ndufa4  | NADH dehydrogenase (ubiquinone) 1 alpha subcomplex, 4                                       | 0.012 |
| ENSMUSP00000085523 | Ndufa9  | NADH dehydrogenase (ubiquinone) 1 alpha subcomplex, 9                                       | 0.016 |
| ENSMUSP00000043543 | Ndufb10 | NADH dehydrogenase (ubiquinone) 1 beta subcomplex, 10                                       | 0.010 |
| ENSMUSP00000092746 | Ndufb6  | NADH dehydrogenase (ubiquinone) 1 beta subcomplex, 6                                        | 0.027 |
| ENSMUSP00000099364 | Nsf     | N-ethylmaleimide sensitive fusion protein                                                   | 0.039 |
| ENSMUSP00000034992 | Nt5e    | 5' nucleotidase, ecto                                                                       | 0.002 |
| ENSMUSP00000004375 | Phb2    | prohibitin 2                                                                                | 0.008 |
| ENSMUSP00000024773 | Prph2   | peripherin 2                                                                                | 0.048 |
| ENSMUSP00000021548 | Rdh12   | retinol dehydrogenase 12                                                                    | 0.046 |
| ENSMUSP00000032471 | Rho     | rhodopsin                                                                                   | 0.016 |
| ENSMUSP00000093961 | Rom1    | rod outer segment membrane protein 1                                                        | 0.003 |
| ENSMUSP00000115722 | Rpl13a  | ribosomal protein L13A                                                                      | 0.047 |
| ENSMUSP00000058368 | Rpl18a  | ribosomal protein L18A                                                                      | 0.009 |
| ENSMUSP00000034966 | Rpl4    | ribosomal protein L4                                                                        | 0.017 |
| ENSMUSP00000099907 | Rtn4    | reticulum 4                                                                                 | 0.018 |
| ENSMUSP00000106968 | Sdhc    | succinate dehydrogenase complex, subunit C, integral membrane protein                       | 0.032 |
| ENSMUSP00000049022 | Sirpa   | signal-regulatory protein alpha                                                             | 0.001 |
| ENSMUSP00000045216 | Slc16a1 | solute carrier family 16 (monocarboxylic acid transporters), member 1                       | 0.033 |
| ENSMUSP00000005493 | Slc1a3  | solute carrier family 1 (glial high affinity glutamate transporter), member 3               | 0.037 |
| ENSMUSP00000016463 | Slc25a5 | solute carrier family 25 (mitochondrial carrier, adenine nucleotide translocator), member 5 | 0.018 |
| ENSMUSP00000101874 | Stx1b   | syntaxin 1B                                                                                 | 0.036 |
| ENSMUSP00000082254 | Sv2b    | synaptic vesicle glycoprotein 2 b                                                           | 0.031 |

|                    |          |                                                                     |       |
|--------------------|----------|---------------------------------------------------------------------|-------|
| ENSMUSP00000026624 | Tm9sf2   | transmembrane 9 superfamily member 2                                | 0.036 |
| ENSMUSP00000037583 | Tmed10   | transmembrane emp24-like trafficking protein 10 (yeast)             | 0.010 |
| ENSMUSP00000023062 | Tomm22   | translocase of outer mitochondrial membrane 22 homolog (yeast)      | 0.040 |
| ENSMUSP00000032555 | Tomm40   | translocase of outer mitochondrial membrane 40 homolog (yeast)      | 0.034 |
| ENSMUSP00000005817 | Tomm40l  | translocase of outer mitochondrial membrane 40 homolog-like (yeast) | 0.041 |
| ENSMUSP00000027738 | Tor1aip1 | torsin A interacting protein 1                                      | 0.024 |
| ENSMUSP00000071135 | Tubb4a   | tubulin, beta 4A class IVA                                          | 0.021 |
| ENSMUSP00000019649 | Ubb      | ubiquitin B                                                         | 0.001 |
| ENSMUSP00000054856 | Uqcr10   | ubiquinol-cytochrome c reductase, complex III subunit X             | 0.006 |
| ENSMUSP00000021993 | Uqcrb    | ubiquinol-cytochrome c reductase binding protein                    | 0.033 |
| ENSMUSP00000026743 | Uqcrc1   | ubiquinol-cytochrome c reductase core protein 1                     | 0.004 |
| ENSMUSP00000024897 | Vapa     | vesicle-associated membrane protein, associated protein A           | 0.029 |

---
