# Supplementary figures and images for: Retinal proteome alterations in a mouse model of type 2 diabetes
Source: Springer Nature journal article supplement (doi:10.1007/s00125-013-3070-2), 2013-09-28

ESM Figure 1. Subcellular Location of Detected Proteins

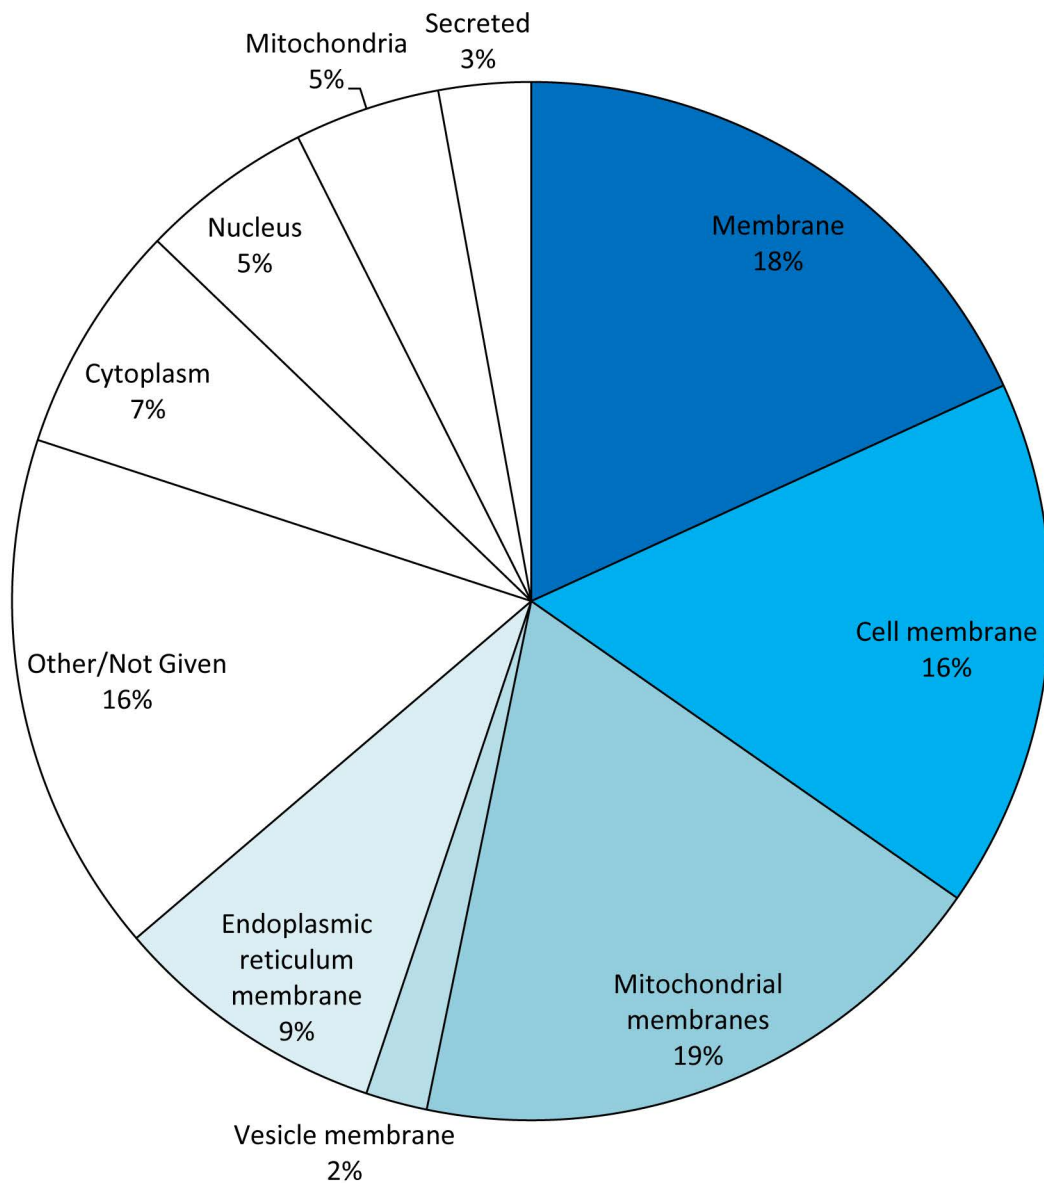

Supplement: MOESM9 [file 8091908]
